# Supplementary material for: Patient reported toxicity and quality of life after hypofractionated high-dose intensity-modulated radiotherapy for intermediate- and high risk prostate cancer
Source: PubMed Central journal article supplement (PMC8170415; doi:10.1016/j.ctro.2021.05.005), 2021-05-21
Supplement: mmc3.pdf [file mmc3.pdf]

**Supplementary Table B.1. Mean scores and 95% confidence interval for the EPIC HRQoL questionnaires**

| <b>Bowel Summary</b> | baseline | during RT | 3 months | 6 months | 12 months | 24 months | 36 months | 48 months | 60 months |
|----------------------|----------|-----------|----------|----------|-----------|-----------|-----------|-----------|-----------|
| Mean                 | 93.3     | 94.7      | 94.2     | 93.8     | 94.1      | 94.9      | 94.7      | 94.5      | 84.6      |
| -95% CI              | 95.3     | 85.9      | 90.5     | 92.2     | 91.5      | 91.4      | 91.1      | 91.6      | 91.8      |
| +95% CI              | 97.0     | 90.2      | 93.2     | 94.3     | 93.8      | 93.8      | 94.0      | 95.2      | 96.4      |

| <b>Urinary Summary</b> | baseline | during RT | 3 months | 6 months | 12 months | 24 months | 36 months | 48 months | 60 months |
|------------------------|----------|-----------|----------|----------|-----------|-----------|-----------|-----------|-----------|
| Mean                   | 91.7     | 79.9      | 85.6     | 89.4     | 89.9      | 88.4      | 89.1      | 89.4      | 87.7      |
| -95% CI                | 90.4     | 77.7      | 84.0     | 88.0     | 88.6      | 86.9      | 87.5      | 87.3      | 85.1      |
| +95% CI                | 93.0     | 82.1      | 87.2     | 90.7     | 91.2      | 89.8      | 90.8      | 91.4      | 90.3      |

---

| <b>Bowel Bother</b> | baseline | during RT | 3 months | 6 months | 12 months | 24 months | 36 months | 48 months | 60 months |
|---------------------|----------|-----------|----------|----------|-----------|-----------|-----------|-----------|-----------|
| Mean                | 97.5     | 91.1      | 93.3     | 94.7     | 94.2      | 93.8      | 94.1      | 94.9      | 94.7      |
| -95% CI             | 96.6     | 89.2      | 91.9     | 93.6     | 93.0      | 92.5      | 92.7      | 93.1      | 92.3      |
| +95% CI             | 98.3     | 93.0      | 94.6     | 95.7     | 95.4      | 95.1      | 95.5      | 96.7      | 97.2      |

| <b>Bowel Function</b> | baseline | during RT | 3 months | 6 months | 12 months | 24 months | 36 months | 48 months | 60 months |
|-----------------------|----------|-----------|----------|----------|-----------|-----------|-----------|-----------|-----------|
| Mean                  | 94.5     | 84.6      | 90.5     | 92.0     | 90.9      | 91.1      | 90.7      | 91.6      | 92.4      |
| -95% CI               | 93.4     | 82.1      | 89.1     | 90.9     | 89.6      | 89.9      | 89.2      | 89.8      | 90.2      |
| +95% CI               | 95.5     | 87.1      | 91.9     | 93.1     | 92.1      | 92.3      | 92.3      | 93.5      | 94.6      |

---

| <b>Urinary Bother</b> | baseline | during RT | 3 months | 6 months | 12 months | 24 months | 36 months | 48 months | 60 months |
|-----------------------|----------|-----------|----------|----------|-----------|-----------|-----------|-----------|-----------|
| Mean                  | 89.5     | 76.7      | 82.7     | 87.8     | 88.2      | 87.3      | 87.2      | 87.4      | 86.1      |
| -95% CI               | 87.9     | 74.4      | 81.0     | 86.4     | 86.8      | 85.7      | 85.4      | 85.1      | 83.1      |
| +95% CI               | 91.1     | 79.1      | 84.5     | 89.3     | 89.6      | 88.9      | 89.1      | 89.8      | 89.0      |

| <b>Urinary Function</b> | baseline | during RT | 3 months | 6 months | 12 months | 24 months | 36 months | 48 months | 60 months |
|-------------------------|----------|-----------|----------|----------|-----------|-----------|-----------|-----------|-----------|
| Mean                    | 94.7     | 85.0      | 89.6     | 91.7     | 92.4      | 90.5      | 91.8      | 92.0      | 90.6      |
| -95% CI                 | 93.5     | 82.5      | 87.7     | 90.3     | 91.1      | 88.9      | 90.2      | 90.2      | 88.0      |
| +95% CI                 | 96.0     | 87.5      | 91.4     | 93.1     | 93.8      | 92.1      | 93.5      | 93.9      | 93.2      |

| Urinary Incontinence | baseline | during RT | 3 months | 6 months | 12 months | 24 months | 36 months | 48 months | 60 months |
|----------------------|----------|-----------|----------|----------|-----------|-----------|-----------|-----------|-----------|
| Mean                 | 94.4     | 89.5      | 90.3     | 90.1     | 90.3      | 87.8      | 88.3      | 88.0      | 86.7      |
| -95% CI              | 92.8     | 86.2      | 88.3     | 88.3     | 88.5      | 85.8      | 85.8      | 85.4      | 83.0      |
| +95% CI              | 96.1     | 92.7      | 92.4     | 91.9     | 92.1      | 89.8      | 90.7      | 90.7      | 90.4      |

  

| Urinary Irritative | baseline | during RT | 3 months | 6 months | 12 months | 24 months | 36 months | 48 months | 60 months |
|--------------------|----------|-----------|----------|----------|-----------|-----------|-----------|-----------|-----------|
| Mean               | 90.6     | 75.2      | 83.5     | 89.5     | 90.1      | 89.6      | 90.1      | 90.6      | 88.6      |
| -95% CI            | 89.2     | 72.9      | 81.8     | 88.3     | 88.8      | 88.2      | 88.6      | 88.6      | 86.2      |
| +95% CI            | 91.9     | 77.5      | 85.3     | 90.8     | 91.4      | 91.0      | 91.6      | 92.6      | 91.0      |

Abbreviations: EPIC = Expanded Prostate cancer Index Composite; RT = radiotherapy; -95% CI = lower end of the 95% confidence interval of the mean; +95% CI = upper end of the 95% confidence interval of the mean
