# Supplementary material for: Patient reported toxicity and quality of life after hypofractionated high-dose intensity-modulated radiotherapy for intermediate- and high risk prostate cancer
Source: PubMed Central journal article supplement (PMC8170415; doi:10.1016/j.ctro.2021.05.005), 2021-05-21
Supplement: mmc4.pdf [file mmc4.pdf]

Supplementary table B.2.

Uni- and multivariate analyses of the prognostic value for predicting long-term grade  $\geq 2$  toxicity

|                                                    | Univariate       |                  | Multivariate        |                  |
|----------------------------------------------------|------------------|------------------|---------------------|------------------|
|                                                    | HR (95% CI)      | p value          | HR (95% CI)         | p value          |
| <b>GU toxicity</b>                                 |                  |                  |                     |                  |
| Age ( $\geq 70$ year)                              | 1.22 (0.83-1.79) | 0.307            |                     |                  |
| Gleason Score ( $\geq 7$ )                         | 1.38 (0.89-2.14) | 0.155            |                     |                  |
| Risk-group (high-risk)                             | 0.86 (0.59-1.28) | 0.463            |                     |                  |
| Treatment group (including (base of) SVs)          | 2.05 (1.12-3.74) | <b>0.017</b>     | 2.77 (0.998-7.68)   | 0.051            |
| Pre-treatment PSA ( $\geq 20$ ng/mL)               | 0.88 (0.54-1.42) | 0.593            |                     |                  |
| Neoadjuvant hormonal therapy ( $>6$ months)        | 1.45 (1.00-2.11) | 0.796            |                     |                  |
| Oral anticoagulants                                | 1.47 (0.85-2.54) | 0.169            |                     |                  |
| Pelvic surgery                                     | 1.89 (1.30-2.76) | <b>0.001</b>     | 1.92 (1.14-3.24)    | <b>0.014</b>     |
| Baseline symptoms of GU toxicity ( $\geq$ grade 1) | 3.43 (1.90-6.19) | <b>&lt;0.001</b> | 3.16 (1.75-5.73)    | <b>&lt;0.001</b> |
| <b>GI toxicity</b>                                 |                  |                  |                     |                  |
| Age ( $\geq 70$ year)                              | 1.42 (0.81-2.51) | 0.226            |                     |                  |
| Gleason Score ( $\geq 7$ )                         | 2.05 (1.00-4.20) | <b>0.050</b>     | 4.04 (1.22 - 13.36) | <b>0.022</b>     |
| Risk-group (high-risk)                             | 1.49 (0.80-2.79) | 0.212            |                     |                  |
| Treatment group (including (base of) SVs)          | 2.12 (0.84-5.34) | 0.110            |                     |                  |
| Pre-treatment PSA ( $\geq 20$ ng/mL)               | 1.49 (0.81-2.75) | 0.199            |                     |                  |
| Neoadjuvant hormonal therapy ( $>6$ months)        | 1.38 (0.61-3.13) | 0.436            |                     |                  |
| Oral anticoagulants                                | 1.46 (0.66-3.24) | 0.354            |                     |                  |
| Pelvic surgery                                     | 1.32 (0.77-2.27) | 0.310            |                     |                  |
| Baseline symptoms of GU toxicity ( $\geq$ grade 1) | 2.87 (1.18-7.02) | <b>0.021</b>     | 3.34 (1.36-8.21)    | <b>0.009</b>     |

Abbreviations: GU = genitourinary; GI = gastrointestinal; SV = seminal vesicles; HR = hazard ratio; CI = confidence interval
